# Supplementary material for: Soil Organic Carbon Storage in Urban Green Space and Its Influencing Factors: A Case Study of the 0–20 cm Soil Layer in Guangzhou City
Source: MDPI journal article supplement (doi:10.3390/land11091484), 2022-09-04
Supplement: s1 [file s1]

## Supplementary Materials

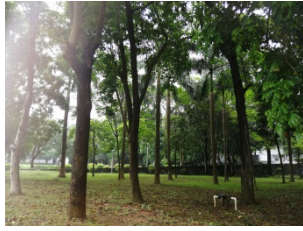

A public park

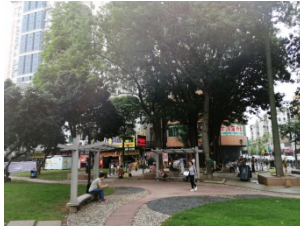

A pocket park

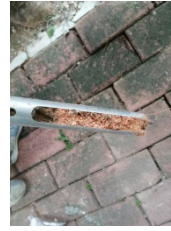

A typical soil sample in residential green space

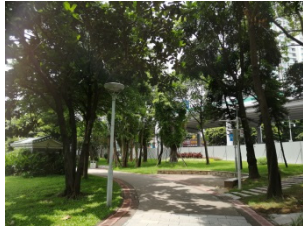

A plot of residential green space

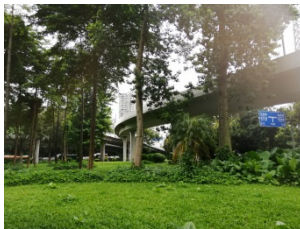

A plot of roadside greenbelt

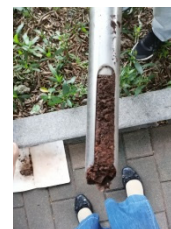

A soil sample in roadside greenbelt

**Figure S1. Some photos of the urban green spaces and soil samples**

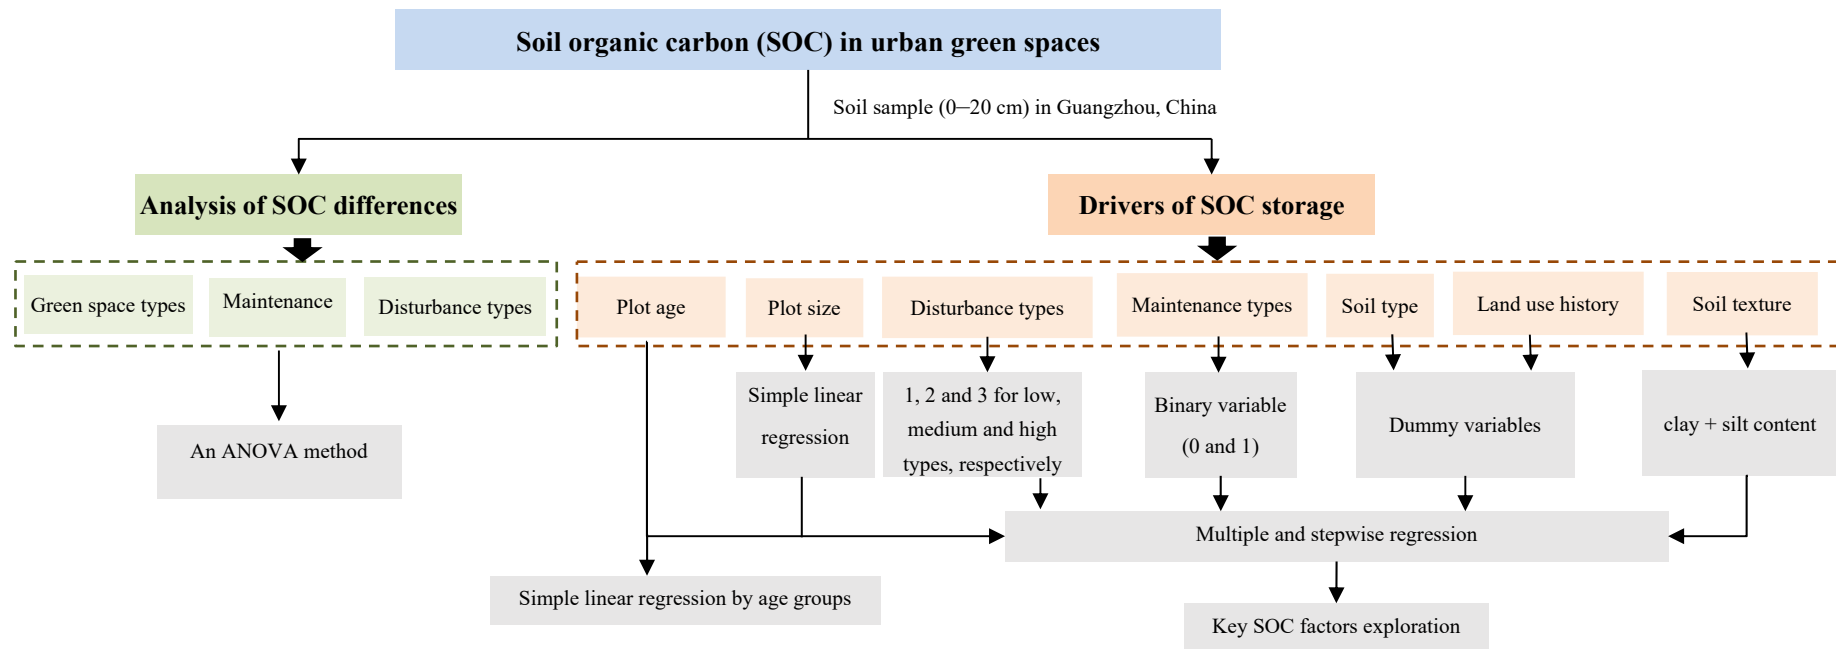

Figure S2. The methodology flowchart

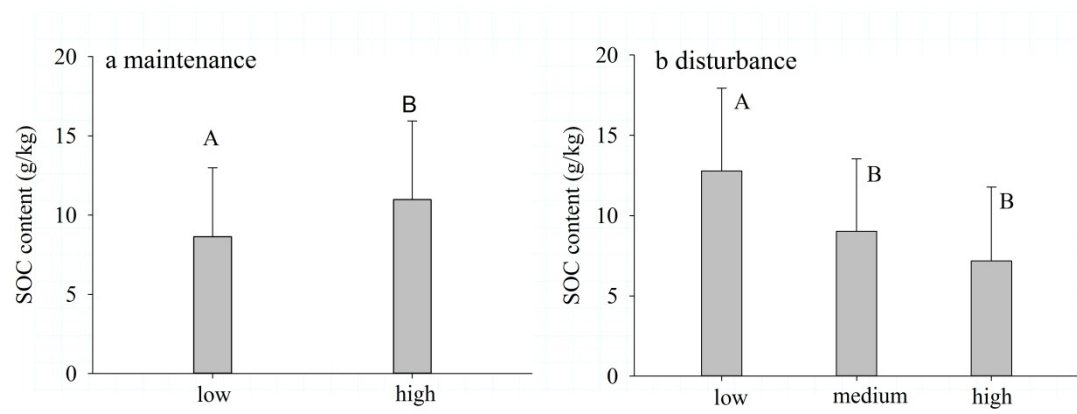

**Figure S3.** Differences in SOC content (g/kg) between (a) maintenance and (b) disturbance intensity types. Columns with different letters represent a significant difference at  $p \leq 0.05$

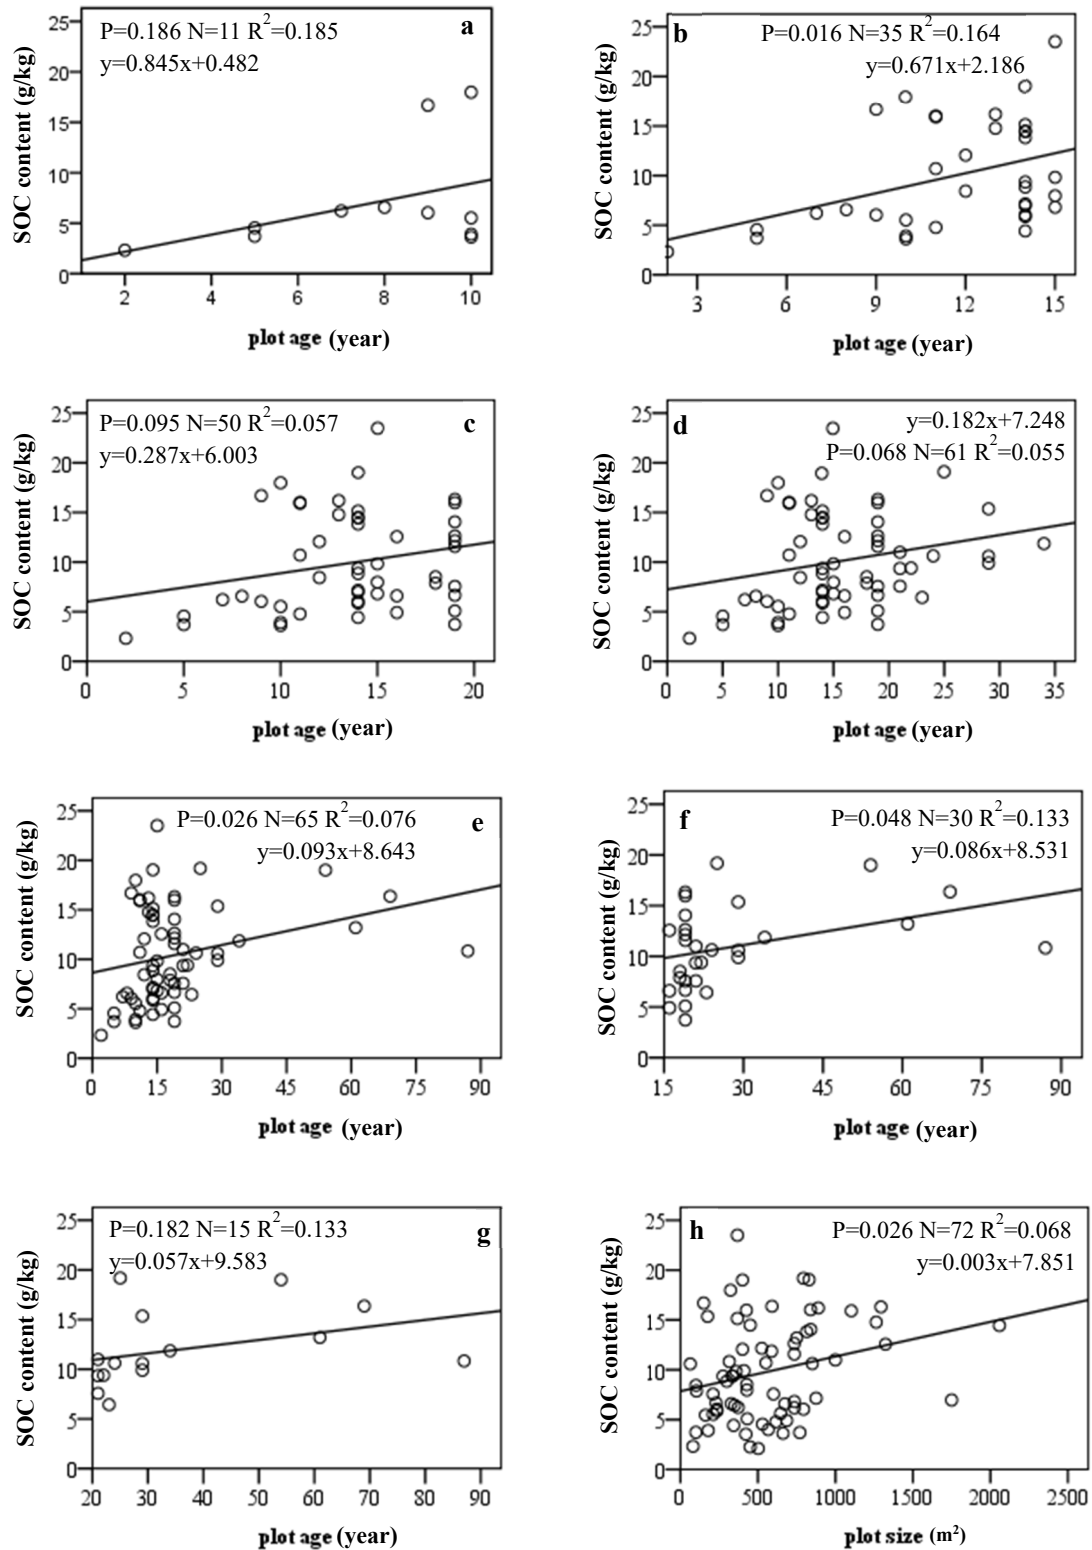

**Figure S4.** Relationship of SOC content (g/kg) to plot age (2–101 years) at age groups: 2–10 years (a), 2–15 years (b), 2–20 years (c), 2–35 years (d) and 2–87 years (e), 16–87 years (f), 21–87 years (g) and to plot size (63–2058 m²) (h). Plots with older age but obviously lower SOC content were removed as abnormal values. A total of 1, 4, 7, 7 and 7 outliers were removed from the 2–20 years (c), 2–35 years (d), 2–87 years (e), 16–87 years (f) and 21–87 years (g), respectively. The outliers removed from the former age group were also removed from the latter age group.

**Table S1.** Regression analysis of SOC content (g/kg) across all sampled plots

| Method   | Variable name                                                   | Partial regression coefficients | P value  |
|----------|-----------------------------------------------------------------|---------------------------------|----------|
| Enter    | Plot size                                                       | 0.003                           | 0.069*   |
|          | Maintenance                                                     | 1.659                           | 0.159    |
| Enter    | Plot size                                                       | 0.003                           | 0.045**  |
|          | Disturbance                                                     | -2.925                          | 0.004*** |
| Enter    | Plot size                                                       | 0.003                           | 0.054*   |
|          | Maintenance                                                     | 0.065                           | 0.960    |
|          | Disturbance                                                     | -2.897                          | 0.012**  |
| Enter    | Plot size                                                       | 0.003                           | 0.046**  |
|          | Maintenance                                                     | -0.301                          | 0.824    |
|          | Disturbance                                                     | -3.172                          | 0.009*** |
|          | Plot age                                                        | 0.028                           | 0.371    |
| Stepwise | Entered variables                                               |                                 |          |
|          | Constant                                                        | 13.489                          | 0.000*** |
|          | Plot size                                                       | 0.003                           | 0.045**  |
|          | Disturbance                                                     | -2.925                          | 0.004*** |
|          | Removed variables                                               |                                 |          |
|          | Maintenance                                                     | 0.031                           | 0.812    |
|          | Plot age                                                        | 0.097                           | 0.382    |
|          | Land use history                                                |                                 |          |
|          | Developed land (the reference category)                         |                                 |          |
|          | Paddy field (rice)                                              | 0.116                           | 0.295    |
|          | Irrigated field                                                 | -0.043                          | 0.698    |
|          | Forest land                                                     | 0.212                           | 0.059*   |
|          | Water                                                           | -0.050                          | 0.653    |
|          | Soil type                                                       |                                 |          |
|          | Soil in the developed land (the reference category)             |                                 |          |
|          | Latosolic red soil developed from red sandy shale (shrubberies) | -0.198                          | 0.074*   |
|          | Vegetable soil                                                  | 0.077                           | 0.489    |
|          | Latosolic red soil developed from granite                       | 0.100                           | 0.372    |
|          | Fertile paddy soil developed from granite river-ocean sediments | -0.030                          | 0.790    |
|          | Latosolic red soil developed from red sandy shale (farming)     | -0.143                          | 0.200    |
|          | Alluvial soil in river terrace and broad valley                 | 0.078                           | 0.493    |
|          | Clay + silt content                                             | 0.062                           | 0.596    |

N=72. \*, \*\* and \*\*\* indicate statistical significance at  $\alpha \leq 0.10$ ,  $\alpha \leq 0.05$  and  $\alpha \leq 0.01$ , respectively. N=72. The Adjusted R<sup>2</sup> of the stepwise regression model was 0.151 and no collinearity in this model. For the variable of soil type, the alluvial soil in the river terrace was grouped in the alluvial soil in broad valley due to sample numbers less than three.

**Table S2.** Stepwise regression analysis of SOC stock (kg/cm<sup>2</sup>) to plot size, maintenance, disturbance, plot age and soil texture across all sampled plots

| Entered or removed | Variable name | Partial regression coefficients | P value  |
|--------------------|---------------|---------------------------------|----------|
| Entered variables  | Constant      | 3.559                           | 0.000*** |
|                    | Plot size     | 0.001                           | 0.045**  |
|                    | Disturbance   | -0.772                          | 0.004*** |
| Removed variables  | Plot age      | 0.097                           | 0.382    |
|                    | maintenance   | 0.031                           | 0.812    |
|                    | Clay content  | 0.088                           | 0.432    |
|                    | Silt content  | 0.080                           | 0.480    |

Adjusted R<sup>2</sup> was 0.175. We assumed that the pocket park had a similar clay and silt content as green space in commercial districts. Values of the new residential and industrial district were not considered since we only had one plot less than two years old.
